# Supplementary material
Source: PubMed Central journal article supplement (PMC3340087)
Supplement: 1113070109_pnas.201113070SI.pdf [file 1113070109_pnas.201113070SI.pdf]

# Supporting Information

Zanobetti et al. 10.1073/pnas.1113070109

**Table S1. Total population and summer temperature standard deviation (SD) in the 135 study cities, 1985–2006**

| City                           | Total year 2000<br>population per 1,000 | Region | Summer<br>temperature SD, °C |      |     | Ozone, ppb |      |      | Heat waves |      |     |
|--------------------------------|-----------------------------------------|--------|------------------------------|------|-----|------------|------|------|------------|------|-----|
|                                |                                         |        | 5%                           | Mean | 95% | Min        | Mean | Max  | Min        | Mean | Max |
| Akron, OH                      | 543                                     | 2      | 4.9                          | 6.3  | 6.8 | 31.6       | 45.2 | 54.6 | 0          | 3.9  | 17  |
| Albuquerque, NM                | 557                                     | 2      | 3.3                          | 5.9  | 4.9 | 34.4       | 41.6 | 47.4 | 0          | 3.8  | 22  |
| Allentown-Bethlehem, PA        | 579                                     | 2      | 5.0                          | 4.3  | 6.7 | 29.7       | 40.0 | 48.5 | 0          | 3.7  | 13  |
| Atlanta, GA                    | 2,090                                   | 4      | 3.0                          | 5.7  | 5.1 | 38.9       | 48.4 | 58.1 | 0          | 4.0  | 23  |
| Atlantic City, NJ              | 253                                     | 3      | 5.0                          | 4.0  | 7.7 | 36.0       | 41.1 | 46.1 | 0          | 3.8  | 13  |
| Austin, TX                     | 812                                     | 5      | 2.8                          | 3.4  | 3.8 | 34.2       | 39.1 | 44.4 | 0          | 3.8  | 17  |
| Bakersfield, CA                | 662                                     | 4      | 4.9                          | 6.2  | 7.6 | 49.5       | 54.0 | 59.9 | 0          | 4.0  | 11  |
| Baltimore, MD                  | 2,114                                   | 3      | 4.8                          | 5.7  | 7.0 | 35.2       | 41.0 | 46.0 | 0          | 3.9  | 14  |
| Barnstable-Yarmouth, MA        | 163                                     | 2      | 4.4                          | 5.7  | 6.7 | 40.3       | 45.2 | 52.2 | 0          | 3.6  | 14  |
| Bergen-Passaic, NJ             | 1,373                                   | 5      | 5.1                          | 2.9  | 7.3 | 24.5       | 32.1 | 47.2 | 0          | 4.0  | 14  |
| Birmingham, AL                 | 662                                     | 2      | 3.0                          | 6.0  | 4.9 | 37.5       | 42.5 | 49.9 | 0          | 4.3  | 18  |
| Boston, MA                     | 3,206                                   | 4      | 5.6                          | 3.9  | 8.4 | 30.0       | 34.8 | 40.1 | 0          | 3.7  | 14  |
| Baton Rouge, LA                | 413                                     | 2      | 2.3                          | 6.7  | 3.7 | 36.0       | 40.4 | 45.1 | 0          | 4.3  | 19  |
| Brownsville, TX                | 335                                     | 5      | 1.7                          | 2.2  | 2.7 | 14.7       | 30.0 | 34.5 | 0          | 4.4  | 23  |
| Buffalo, NY                    | 950                                     | 1      | 4.9                          | 5.9  | 6.5 | 28.0       | 35.3 | 43.1 | 0          | 3.8  | 15  |
| Canton-Massillon, OH           | 378                                     | 2      | 4.9                          | 5.9  | 6.8 | 37.1       | 46.9 | 53.3 | 0          | 3.9  | 17  |
| Charleston, WV                 | 200                                     | 3      | 4.2                          | 5.0  | 5.8 | 20.6       | 40.3 | 55.0 | 0          | 4.3  | 20  |
| Charlotte, NC                  | 695                                     | 4      | 3.3                          | 4.3  | 5.6 | 42.1       | 51.1 | 60.0 | 0          | 4.0  | 22  |
| Chattanooga, TN                | 308                                     | 3      | 3.4                          | 4.0  | 5.2 | 37.8       | 45.6 | 57.9 | 0          | 4.2  | 26  |
| Chicago, IL                    | 8,092                                   | 2      | 5.9                          | 6.6  | 7.7 | 26.8       | 31.2 | 35.4 | 0          | 3.9  | 21  |
| Cincinnati, OH                 | 2,524                                   | 3      | 4.5                          | 5.4  | 6.2 | 34.6       | 44.5 | 50.7 | 0          | 3.9  | 17  |
| Cleveland, OH                  | 1,906                                   | 2      | 5.4                          | 6.2  | 7.1 | 31.6       | 41.4 | 48.3 | 0          | 4.1  | 19  |
| Columbia, SC                   | 321                                     | 4      | 3.0                          | 4.1  | 5.6 | 36.0       | 41.0 | 44.8 | 0          | 4.0  | 16  |
| Columbus, OH                   | 1,069                                   | 2      | 4.8                          | 5.6  | 6.6 | 29.9       | 44.1 | 51.2 | 0          | 4.1  | 16  |
| Dallas, TX                     | 2,219                                   | 5      | 3.5                          | 4.4  | 5.1 | 31.4       | 37.8 | 43.7 | 0          | 4.0  | 29  |
| Daytona Beach, FL              | 443                                     | 5      | 1.8                          | 5.7  | 2.7 | 34.8       | 38.2 | 41.5 | 0          | 3.8  | 26  |
| Dayton, OH                     | 559                                     | 3      | 4.9                          | 2.2  | 6.4 | 33.5       | 45.3 | 52.5 | 0          | 4.2  | 22  |
| Denver, CO                     | 1,082                                   | 1      | 4.7                          | 6.2  | 8.1 | 31.8       | 36.5 | 41.2 | 0          | 3.9  | 12  |
| Des Moines, IA                 | 375                                     | 1      | 5.3                          | 6.1  | 7.0 | 5.3        | 26.3 | 43.0 | 0          | 4.1  | 22  |
| Detroit, MI                    | 4,043                                   | 2      | 5.0                          | 5.9  | 6.9 | 24.7       | 39.0 | 46.9 | 0          | 4.0  | 17  |
| Dutchess County, NY            | 280                                     | 2      | 4.9                          | 5.9  | 6.8 | 14.3       | 33.6 | 41.6 | 0          | 3.6  | 12  |
| El Paso, TX                    | 680                                     | 5      | 3.3                          | 4.2  | 5.1 | 33.5       | 39.8 | 45.0 | 0          | 3.8  | 24  |
| Erie, PA                       | 281                                     | 1      | 5.3                          | 6.1  | 6.8 | 32.9       | 41.4 | 52.3 | 0          | 4.2  | 13  |
| Flint, MI                      | 436                                     | 2      | 5.3                          | 6.3  | 7.8 | 36.2       | 42.8 | 51.2 | 0          | 3.9  | 16  |
| Fresno, CA                     | 799                                     | 4      | 4.6                          | 1.9  | 7.4 | 45.1       | 51.4 | 59.5 | 0          | 3.8  | 13  |
| Ft. Lauderdale, FL             | 1,623                                   | 5      | 1.5                          | 1.9  | 2.3 | 28.9       | 32.7 | 35.8 | 0          | 4.3  | 17  |
| Fort Myers-Cape Coral, FL      | 441                                     | 5      | 1.5                          | 4.4  | 2.9 | 35.0       | 37.4 | 39.8 | 0          | 4.0  | 17  |
| Fort Pierce-Port St. Lucie, FL | 319                                     | 5      | 1.5                          | 5.9  | 2.3 | 30.8       | 36.3 | 39.6 | 0          | 4.4  | 17  |
| Fort Worth-Arlington, TX       | 1,446                                   | 5      | 3.2                          | 2.0  | 5.3 | 37.5       | 42.8 | 46.7 | 0          | 2.4  | 14  |
| Galveston, TX                  | 250                                     | 5      | 1.7                          | 2.6  | 3.4 | 31.2       | 36.0 | 44.0 | 0          | 2.9  | 17  |
| Gary, IN                       | 485                                     | 2      | 5.4                          | 6.2  | 7.7 | 35.5       | 44.1 | 51.9 | 0          | 3.7  | 28  |
| Grand Rapids, MI               | 574                                     | 2      | 5.4                          | 6.1  | 7.1 | 36.1       | 43.6 | 50.2 | 0          | 3.7  | 15  |
| Greensboro, NC                 | 421                                     | 4      | 3.5                          | 4.8  | 6.3 | 42.1       | 53.3 | 65.4 | 0          | 3.7  | 9   |
| Greenville, SC                 | 380                                     | 4      | 3.0                          | 4.2  | 5.6 | —          | —    | —    | 0          | 4.0  | 18  |
| Hamilton, OH                   | 333                                     | 3      | 4.5                          | 5.4  | 6.2 | 34.5       | 46.1 | 53.9 | 0          | 3.9  | 17  |
| Harrisburg-Carlisle, PA        | 465                                     | 2      | 3.7                          | 5.6  | 6.9 | 32.4       | 41.3 | 51.5 | 0          | 2.6  | 14  |
| Hartford, CT                   | 855                                     | 2      | 5.1                          | 6.2  | 7.8 | 31.7       | 39.8 | 47.2 | 0          | 4.0  | 12  |
| Honolulu, HI                   | 876                                     | 5      | 1.0                          | 1.4  | 1.8 | 3.5        | 18.7 | 29.7 | 0          | 5.4  | 32  |
| Houston, TX                    | 3,401                                   | 5      | 2.1                          | 3.1  | 3.8 | 34.2       | 37.9 | 43.6 | 0          | 4.4  | 16  |
| Indianapolis, IN               | 860                                     | 2      | 4.6                          | 5.4  | 6.2 | 43.1       | 49.3 | 55.7 | 0          | 3.7  | 23  |
| Jacksonville, FL               | 779                                     | 5      | 2.0                          | 2.9  | 3.9 | 35.6       | 40.1 | 43.8 | 0          | 4.2  | 16  |
| Jersey City, NJ                | 609                                     | 2      | 5.1                          | 6.0  | 7.3 | 27.7       | 32.8 | 37.2 | 0          | 4.0  | 14  |
| Kansas City, MO-KS             | 1,106                                   | 2      | 5.1                          | 6.0  | 7.1 | 27.4       | 39.4 | 47.8 | 0          | 4.0  | 17  |

Table S1. Cont.

| City                               | Total year 2000<br>population per 1,000 | Region | Summer<br>temperature SD, °C |      |     | Ozone, ppb |      |      | Heat waves |      |     |
|------------------------------------|-----------------------------------------|--------|------------------------------|------|-----|------------|------|------|------------|------|-----|
|                                    |                                         |        | 5%                           | Mean | 95% | Min        | Mean | Max  | Min        | Mean | Max |
| Knoxville, TN                      | 382                                     | 3      | 3.2                          | 4.2  | 5.3 | 34.6       | 47.9 | 64.1 | 0          | 3.9  | 16  |
| Lakeland-Winter Haven, FL          | 484                                     | 5      | 1.8                          | 2.1  | 2.6 | 34.8       | 39.1 | 43.2 | 0          | 4.6  | 22  |
| Lancaster, PA                      | 471                                     | 3      | 4.8                          | 5.7  | 6.6 | 31.3       | 43.1 | 54.9 | 0          | 3.7  | 15  |
| Lansing, MI                        | 279                                     | 2      | 5.5                          | 6.4  | 7.6 | 34.7       | 43.2 | 50.9 | 0          | 3.8  | 17  |
| Las Vegas, NV-AZ                   | 1,531                                   | 5      | 4.1                          | 5.6  | 7.5 | 36.7       | 42.5 | 47.1 | 0          | 4.0  | 12  |
| Los Angeles, CA                    | 9,519                                   | 4      | 1.9                          | 4.5  | 4.4 | 34.8       | 43.9 | 55.3 | 0          | 3.7  | 12  |
| Louisville, KY                     | 694                                     | 3      | 4.2                          | 3.1  | 6.2 | 28.3       | 41.0 | 52.0 | 0          | 4.1  | 15  |
| Little Rock, AR                    | 361                                     | 4      | 3.3                          | 5.1  | 5.5 | 35.9       | 39.4 | 42.6 | 0          | 3.7  | 17  |
| Lubbock, TX                        | 243                                     | 4      | 4.0                          | 5.0  | 6.1 | —          | —    | —    | 0          | 4.1  | 14  |
| Madison, WI                        | 427                                     | 1      | 5.5                          | 6.4  | 7.7 | 34.8       | 42.3 | 51.5 | 0          | 4.0  | 19  |
| McAllen-Edinburg-Mission, TX       | 569                                     | 5      | 2.2                          | 2.8  | 3.4 | 31.8       | 33.7 | 35.5 | 0          | 3.6  | 11  |
| Melbourne-Titusville-Palm Bay, FL  | 476                                     | 5      | 1.5                          | 1.9  | 2.6 | 34.2       | 38.1 | 42.4 | 0          | 4.3  | 36  |
| Memphis, TN                        | 897                                     | 4      | 3.4                          | 4.4  | 5.2 | 42.0       | 51.1 | 60.4 | 0          | 3.7  | 15  |
| Miami, FL                          | 2,253                                   | 5      | 1.8                          | 2.1  | 2.7 | 31.1       | 34.1 | 37.8 | 0          | 5.0  | 19  |
| Middlesex, NJ                      | 750                                     | 3      | 5.2                          | 6.0  | 7.1 | 30.5       | 37.0 | 43.7 | 0          | 3.6  | 14  |
| Milwaukee, WI                      | 1,301                                   | 1      | 6.1                          | 7.0  | 7.9 | 33.3       | 41.1 | 49.0 | 0          | 3.7  | 14  |
| Minneapolis-St. Paul, MN           | 1,627                                   | 1      | 5.6                          | 6.3  | 7.4 | —          | —    | —    | 0          | 3.7  | 16  |
| Mobile, AL                         | 400                                     | 5      | 2.1                          | 2.8  | 3.7 | 29.6       | 41.5 | 51.8 | 0          | 4.1  | 25  |
| Monmouth-Ocean, NJ                 | 1,126                                   | 3      | 4.2                          | 6.2  | 7.5 | 36.1       | 44.0 | 53.9 | 0          | 2.9  | 18  |
| Myrtle Beach, SC                   | 197                                     | 4      | 2.9                          | 4.0  | 5.7 | —          | —    | —    | 0          | 3.9  | 32  |
| Naples, FL                         | 251                                     | 5      | 1.3                          | 1.8  | 2.6 | —          | —    | —    | 0          | 4.5  | 23  |
| Nashua, NH                         | 191                                     | 1      | 4.8                          | 6.3  | 8.0 | 28.1       | 39.2 | 46.1 | 0          | 3.7  | 19  |
| Nashville, TN                      | 570                                     | 4      | 3.4                          | 4.5  | 5.7 | 24.3       | 34.1 | 44.3 | 0          | 3.7  | 15  |
| Nassau-Suffolk, NY                 | 2,754                                   | 3      | 4.9                          | 5.8  | 7.0 | 30.4       | 35.4 | 39.6 | 0          | 3.8  | 14  |
| Newark, NJ                         | 1,786                                   | 2      | 5.1                          | 6.2  | 7.3 | 29.4       | 34.4 | 39.7 | 0          | 4.0  | 14  |
| Newburgh, NY                       | 341                                     | 2      | 4.8                          | 5.9  | 6.6 | 41.7       | 45.8 | 50.7 | 0          | 4.3  | 16  |
| New Haven-Meriden, CT              | 523                                     | 2      | 5.1                          | 5.9  | 7.8 | 36.2       | 42.2 | 51.5 | 0          | 4.0  | 12  |
| New London, CT                     | 233                                     | 2      | 4.6                          | 6.0  | 7.5 | 39.0       | 46.5 | 51.9 | 0          | 3.7  | 13  |
| New York, NY                       | 8,932                                   | 3      | 4.9                          | 5.8  | 7.2 | 24.7       | 29.2 | 33.2 | 0          | 3.9  | 11  |
| Oakland, CA                        | 2,393                                   | 4      | 2.8                          | 3.7  | 4.6 | 26.3       | 29.7 | 34.0 | 0          | 3.5  | 11  |
| Ocala, FL                          | 259                                     | 5      | 1.8                          | 2.3  | 2.9 | —          | —    | —    | 0          | 4.3  | 32  |
| Oklahoma City, OK                  | 660                                     | 4      | 3.9                          | 5.1  | 5.9 | 34.8       | 40.9 | 45.6 | 0          | 4.0  | 24  |
| Omaha, NE                          | 464                                     | 2      | 5.3                          | 6.4  | 7.2 | 26.6       | 32.6 | 41.6 | 0          | 3.7  | 14  |
| Orange County, CA                  | 2,846                                   | 4      | 2.8                          | 3.8  | 4.8 | 34.2       | 40.0 | 45.7 | 0          | 3.9  | 14  |
| Orlando, FL                        | 1,472                                   | 5      | 1.6                          | 2.1  | 2.9 | 33.9       | 40.0 | 44.0 | 0          | 3.8  | 16  |
| Pensacola, FL                      | 294                                     | 5      | 2.1                          | 2.8  | 3.6 | 38.0       | 42.1 | 45.9 | 0          | 3.7  | 18  |
| Philadelphia, PA-NJ                | 5,037                                   | 3      | 4.7                          | 5.7  | 6.8 | 32.8       | 37.4 | 41.7 | 0          | 4.0  | 14  |
| Phoenix, AZ                        | 3,072                                   | 5      | 3.3                          | 4.8  | 6.4 | 30.5       | 45.2 | 49.7 | 0          | 4.1  | 11  |
| Pittsburgh, PA                     | 1,855                                   | 2      | 4.7                          | 5.7  | 6.4 | 28.1       | 37.3 | 43.9 | 0          | 4.0  | 20  |
| Portland, ME                       | 220                                     | 1      | 5.0                          | 6.1  | 7.8 | 29.2       | 39.5 | 49.0 | 0          | 3.8  | 17  |
| Portland, OR                       | 1,444                                   | 3      | 4.8                          | 5.7  | 6.5 | 26.5       | 33.2 | 37.4 | 0          | 4.0  | 12  |
| Providence-Fall River, RI-MA       | 855                                     | 2      | 4.7                          | 6.1  | 8.0 | 36.8       | 41.7 | 49.0 | 0          | 3.7  | 15  |
| Punta Gorda, FL                    | 142                                     | 5      | 1.7                          | 2.0  | 2.6 | —          | —    | —    | 0          | 4.8  | 22  |
| Raleigh, NC                        | 628                                     | 4      | 3.8                          | 4.9  | 6.6 | 40.6       | 51.5 | 63.4 | 0          | 4.2  | 16  |
| Reading, PA                        | 374                                     | 3      | 3.8                          | 4.9  | 6.6 | 31.7       | 40.8 | 50.2 | 0          | 4.2  | 16  |
| Riverside-San Bernardino, CA       | 3,255                                   | 4      | 4.0                          | 5.2  | 6.4 | 48.2       | 53.5 | 60.9 | 0          | 3.8  | 18  |
| Rochester, NY                      | 735                                     | 1      | 5.2                          | 6.1  | 7.0 | 27.1       | 32.3 | 37.7 | 0          | 4.4  | 12  |
| Rockford, IL                       | 278                                     | 2      | 5.1                          | 6.1  | 7.5 | 30.1       | 33.9 | 43.8 | 0          | 3.7  | 19  |
| Sacramento, CA                     | 1,223                                   | 3      | 4.0                          | 5.4  | 6.5 | 37.5       | 42.1 | 49.1 | 0          | 4.0  | 12  |
| Saginaw, MI                        | 210                                     | 1      | 5.5                          | 6.3  | 7.4 | —          | —    | —    | 0          | 3.9  | 17  |
| Salinas, CA                        | 402                                     | 4      | 2.3                          | 3.1  | 3.8 | 31.1       | 34.6 | 39.2 | 0          | 3.6  | 11  |
| Salt Lake City, UT                 | 898                                     | 2      | 5.5                          | 7.0  | 9.0 | 36.1       | 48.7 | 57.8 | 0          | 4.0  | 20  |
| San Antonio, TX                    | 1,393                                   | 5      | 2.7                          | 3.3  | 4.0 | 31.7       | 38.0 | 42.9 | 0          | 4.1  | 16  |
| Sarasota-Bradenton, FL             | 590                                     | 5      | 1.6                          | 3.1  | 3.2 | 31.2       | 38.6 | 42.2 | 0          | 3.6  | 34  |
| Scranton-Wilkes-Barre-Hazleton, PA | 533                                     | 2      | 5.1                          | 3.5  | 6.4 | 32.3       | 40.7 | 48.0 | 0          | 3.7  | 16  |
| San Diego, CA                      | 2,814                                   | 4      | 2.4                          | 4.5  | 4.1 | 38.4       | 44.6 | 50.7 | 0          | 4.0  | 13  |
| Seattle, WA                        | 1,737                                   | 3      | 4.3                          | 2.1  | 5.7 | 25.8       | 31.6 | 37.2 | 0          | 3.9  | 11  |
| San Francisco, CA                  | 1,484                                   | 4      | 2.6                          | 5.8  | 4.6 | 18.9       | 23.2 | 27.8 | 0          | 3.7  | 10  |
| Shreveport, LA                     | 252                                     | 5      | 2.7                          | 5.1  | 4.4 | 40.1       | 44.1 | 49.0 | 0          | 4.2  | 23  |
| San Jose, CA                       | 1,683                                   | 4      | 3.1                          | 3.7  | 5.7 | 28.3       | 32.1 | 39.7 | 0          | 3.7  | 9   |

Table S1. Cont.

| City                                | Total year 2000<br>population per 1,000 | Region | Summer<br>temperature SD, °C |      |     | Ozone, ppb |      |      | Heat waves |      |     |
|-------------------------------------|-----------------------------------------|--------|------------------------------|------|-----|------------|------|------|------------|------|-----|
|                                     |                                         |        | 5%                           | Mean | 95% | Min        | Mean | Max  | Min        | Mean | Max |
| Spokane, WA                         | 418                                     | 1      | 5.7                          | 7.4  | 8.4 | 36.0       | 44.0 | 50.9 | 0          | 3.9  | 12  |
| Springfield, MA                     | 444                                     | 2      | 5.1                          | 6.2  | 7.8 | 29.0       | 37.0 | 45.2 | 0          | 4.0  | 12  |
| Stamford-Norwalk, CT                | 354                                     | 2      | 4.6                          | 6.0  | 6.9 | 38.0       | 45.3 | 51.5 | 0          | 4.3  | 11  |
| St. Louis, MO-IL                    | 1,880                                   | 3      | 5.2                          | 5.7  | 6.8 | 32.3       | 37.2 | 42.1 | 0          | 4.2  | 18  |
| Stockton-Lodi, CA                   | 564                                     | 4      | 4.3                          | 5.5  | 6.8 | 34.0       | 39.3 | 48.5 | 0          | 3.9  | 13  |
| Syracuse, NY                        | 458                                     | 1      | 5.3                          | 6.1  | 7.3 | 21.9       | 33.3 | 38.4 | 0          | 4.0  | 15  |
| Tacoma, WA                          | 701                                     | 3      | 3.4                          | 4.2  | 5.0 | 26.9       | 33.2 | 38.6 | 0          | 3.5  | 15  |
| Tampa-St. Petersburg-Clearwater, FL | 2,396                                   | 5      | 1.7                          | 2.1  | 2.5 | 34.9       | 39.4 | 43.1 | 0          | 4.5  | 21  |
| Toledo, OH                          | 455                                     | 2      | 5.3                          | 6.1  | 6.9 | 30.1       | 40.6 | 49.0 | 0          | 4.0  | 15  |
| Trenton, NJ                         | 351                                     | 3      | 5.4                          | 6.2  | 7.2 | 35.8       | 39.5 | 45.3 | 0          | 3.8  | 13  |
| Tucson, AZ                          | 844                                     | 3      | 3.3                          | 4.4  | 5.4 | 38.8       | 43.2 | 45.6 | 0          | 4.3  | 20  |
| Tulsa, OK                           | 563                                     | 4      | 4.4                          | 5.6  | 6.6 | 37.9       | 42.2 | 46.5 | 0          | 4.4  | 15  |
| Utica-Rome, NY                      | 235                                     | 1      | 5.2                          | 6.1  | 7.0 | 31.5       | 35.4 | 42.6 | 0          | 4.0  | 11  |
| Ventura County, CA                  | 753                                     | 4      | 2.2                          | 3.0  | 4.0 | 42.5       | 49.0 | 55.8 | 0          | 3.5  | 17  |
| Virginia Beach, VA                  | 425                                     | 4      | 4.1                          | 5.3  | 6.4 | —          | —    | —    | 0          | 3.7  | 13  |
| Washington, DC-MD-VA                | 3,217                                   | 3      | 4.4                          | 5.5  | 7.1 | 33.8       | 37.3 | 42.3 | 0          | 3.7  | 13  |
| Wichita, KS                         | 453                                     | 3      | 4.9                          | 2.0  | 7.3 | 29.2       | 35.2 | 42.3 | 0          | 4.1  | 17  |
| Wilmington, DE                      | 500                                     | 3      | 4.9                          | 6.1  | 7.0 | 32.4       | 37.9 | 45.4 | 0          | 3.8  | 11  |
| Worcester, MA                       | 500                                     | 2      | 5.2                          | 5.7  | 8.1 | 35.5       | 41.0 | 47.0 | 0          | 3.7  | 18  |
| West Palm Beach-Boca Raton, FL      | 1,131                                   | 5      | 1.6                          | 6.2  | 2.5 | 16.0       | 31.8 | 36.8 | 0          | 4.7  | 21  |
| York, PA                            | 382                                     | 2      | 4.7                          | 5.5  | 6.4 | 31.6       | 41.6 | 50.8 | 0          | 3.9  | 17  |
| Youngstown-Warren, OH               | 483                                     | 2      | 5.2                          | 6.2  | 7.0 | 31.0       | 44.0 | 51.3 | 0          | 4.0  | 18  |

—, no measurements of ozone available.

Table S2. Main effects of the geographic variables at the zip code level across 135 US cities: Hazard ratio (HR) and 95% confidence interval (CI) for an interquartile range (IQR) increase in each geographic variable

|                                                                | HR   | 95% CI    | IQR   |
|----------------------------------------------------------------|------|-----------|-------|
| Population density (per km <sup>2</sup> )                      |      |           |       |
| Diabetes                                                       | 1.00 | 1.00–1.01 | 351.9 |
| Chronic obstructive pulmonary disease                          | 1.01 | 1.00–1.01 | 351.9 |
| Myocardial infarction                                          | 1.01 | 1.00–1.01 | 351.9 |
| Congestive heart failure                                       | 1.00 | 1.00–1.01 | 351.9 |
| Proportion of the population below poverty level               |      |           |       |
| Diabetes                                                       | 1.02 | 1.01–1.03 | 0.04  |
| Chronic obstructive pulmonary disease                          | 1.02 | 1.01–1.02 | 0.04  |
| Myocardial infarction                                          | 1.03 | 1.02–1.04 | 0.04  |
| Congestive heart failure                                       | 1.01 | 1.00–1.02 | 0.04  |
| Proportion of green surface                                    |      |           |       |
| Diabetes                                                       | 0.99 | 0.98–1.00 | 0.15  |
| Chronic obstructive pulmonary disease                          | 0.99 | 0.98–1.00 | 0.15  |
| Myocardial infarction                                          | 0.99 | 0.97–1.00 | 0.15  |
| Congestive heart failure                                       | 1.00 | 0.99–1.01 | 0.15  |
| Proportion of black population                                 |      |           |       |
| Diabetes                                                       | 1.02 | 1.01–1.03 | 0.14  |
| Chronic obstructive pulmonary disease                          | 1.02 | 1.01–1.04 | 0.14  |
| Myocardial infarction                                          | 1.03 | 1.01–1.05 | 0.14  |
| Congestive heart failure                                       | 1.01 | 1.00–1.02 | 0.14  |
| Proportion of the population aged > 25 y who completed college |      |           |       |
| Diabetes                                                       | 0.98 | 0.97–0.99 | 0.09  |
| Chronic obstructive pulmonary disease                          | 0.99 | 0.98–1.00 | 0.09  |
| Myocardial infarction                                          | 0.97 | 0.95–0.99 | 0.09  |
| Congestive heart failure                                       | 1.00 | 0.98–1.01 | 0.09  |
